# Supplementary material for: Synthesis and enhancement luminescence of 3D NaReF4 (Re = Eu, Sm) hierarchical microstructures assembled by nanosheets
Source: Royal Society of Chemistry journal article supplement (doi:10.1039/c7ce01817g), 2017-12-13

## Support information

**Supplementary Figure 1:** XRD patterns of NaEuF<sub>4</sub> products obtained at different dosage of oxalic acid and the mole ratio of nEu<sup>3+</sup>/nF<sup>-</sup>.

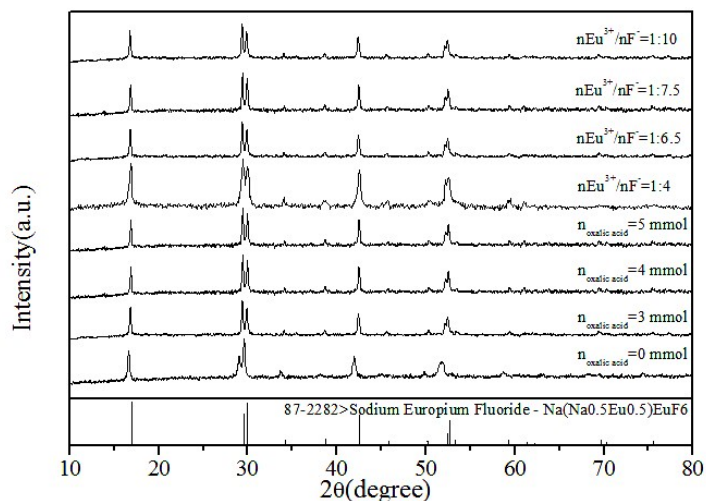

Fig.S1 shows the XRD patterns of the NaEuF<sub>4</sub> product synthesized at different dosage of oxalic acid and the mole ratio of nEu<sup>3+</sup>/nF<sup>-</sup> (no changed other condition). The samples exhibit the peaks of the pure hexagonal phase Na(Na<sub>0.5</sub>Eu<sub>0.5</sub>)EuF<sub>6</sub> (JCPDS Card No.87-2282). No peaks of other impurity crystalline phases were detected.

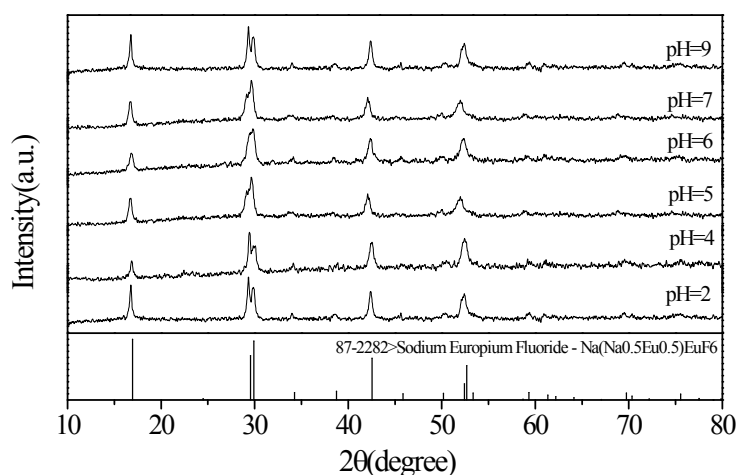

**Supplementary Figure 2:** XRD patterns of NaEuF<sub>4</sub> products obtained at different pH value.

Fig.S2 shows the XRD patterns of the NaEuF<sub>4</sub> product synthesized at different pH value. The samples exhibit the peaks of the pure hexagonal phase Na(Na<sub>0.5</sub>Eu<sub>0.5</sub>)EuF<sub>6</sub> (JCPDS Card No.87-2282). No peaks of other impurity crystalline phases were detected.

### Synthesis of NaSmF<sub>4</sub> flowerlike structure

0.5 mmol Sm<sub>2</sub>O<sub>3</sub> were dissolved in a dilute HNO<sub>3</sub> (3 mol L<sup>-1</sup>, 40 mL), and then added 4 mmol oxalic acids (10 mL) to form the metal-oxalic complex with magnetic stirring. After that, 4 mmol NaF was added to the above solution under vigorous stirring and adjusted the pH = 6 using a dilute NaOH solution. The mixture was transferred into a 30 mL Teflon-lined autoclave. The autoclave was tightly sealed and heated at 180 °C for 12h. Finally, it was cooled to room temperature naturally, and the products were collected, washed several times with distilled water and absolute ethanol in turn, and then dried in air at 60 °C for 12h.

**Supplementary Figure 3:** XRD patterns of NaSmF<sub>4</sub> samples

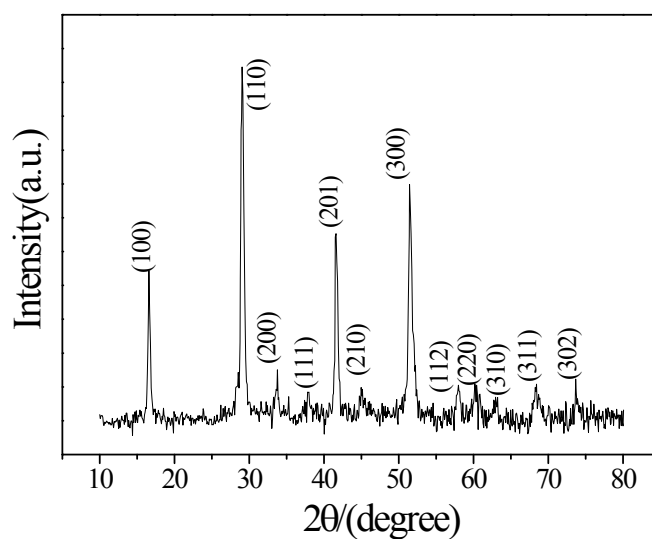

XRD patterns show well-resolved diffraction peaks consistent with high crystallinity, which can be indexed to hexagonal phase NaSmF<sub>4</sub> (JCPDS No.27-0779). The XRD result indicates that the phase of the as-obtained flowerlike structure is very pure.

Supplementary Figure 4: FESEM of NaSmF<sub>4</sub> flowerlike structure

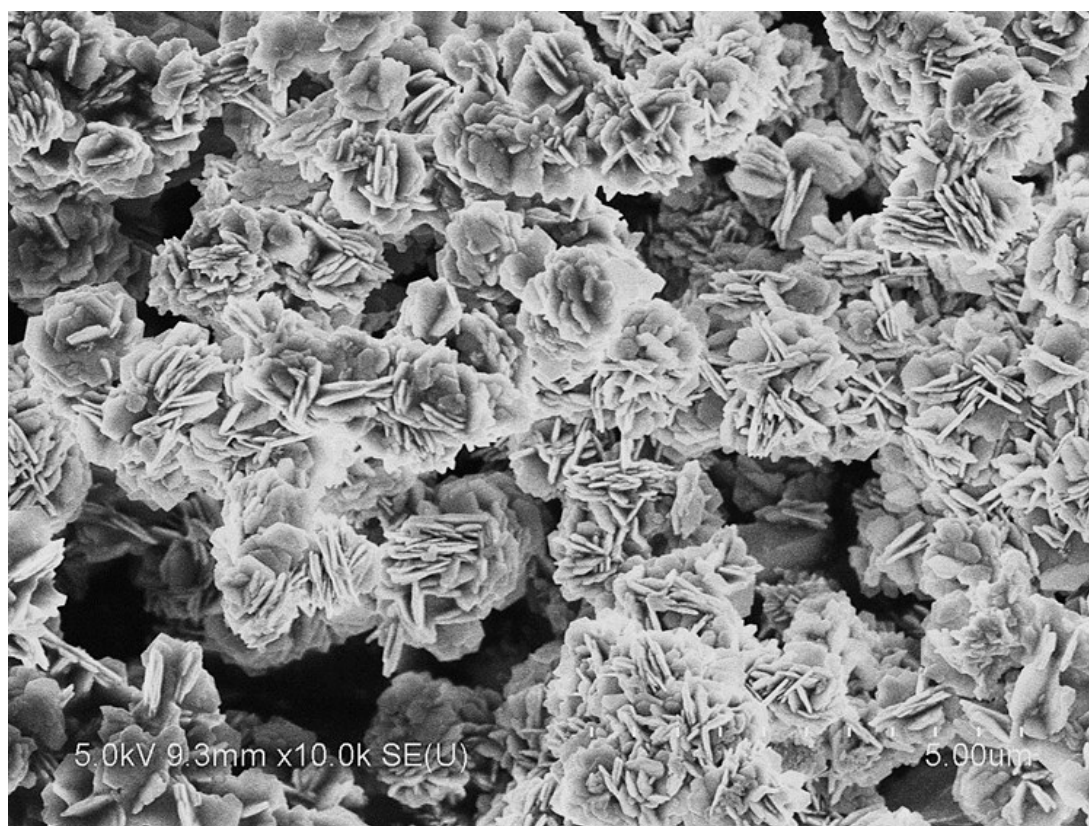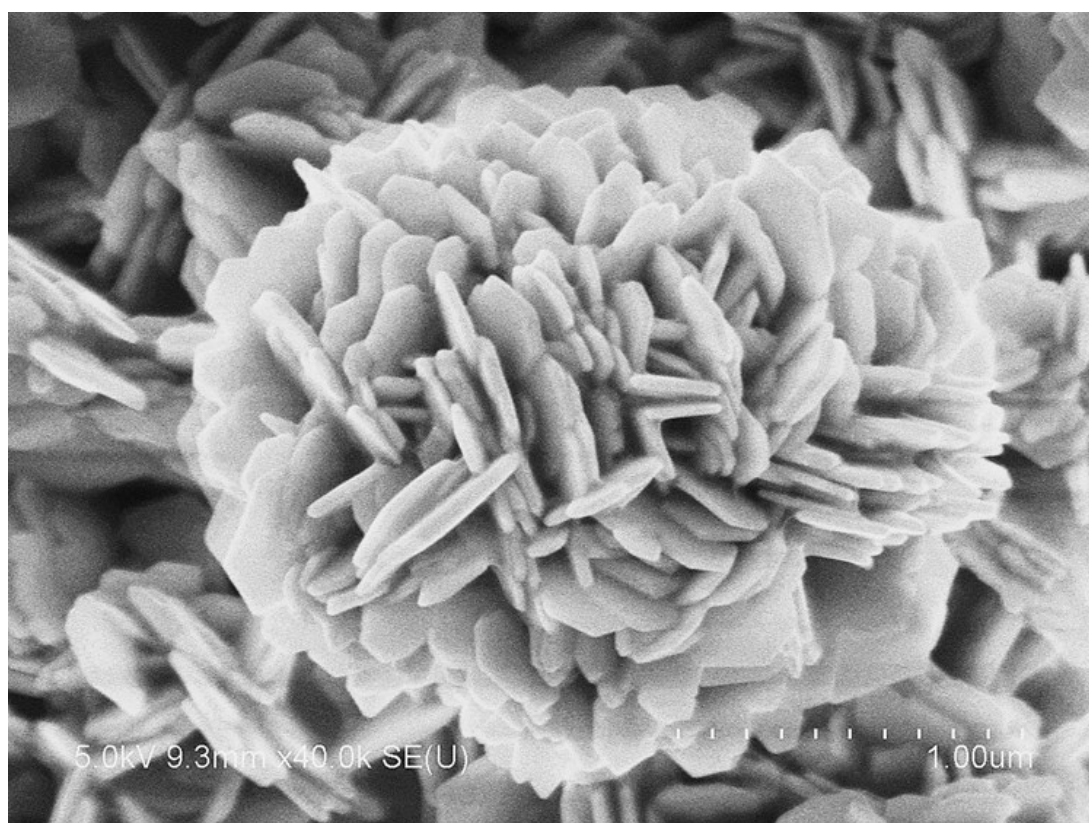

**Supplementary Figure 5:** FESEM of NaSmF<sub>4</sub> oblate structure

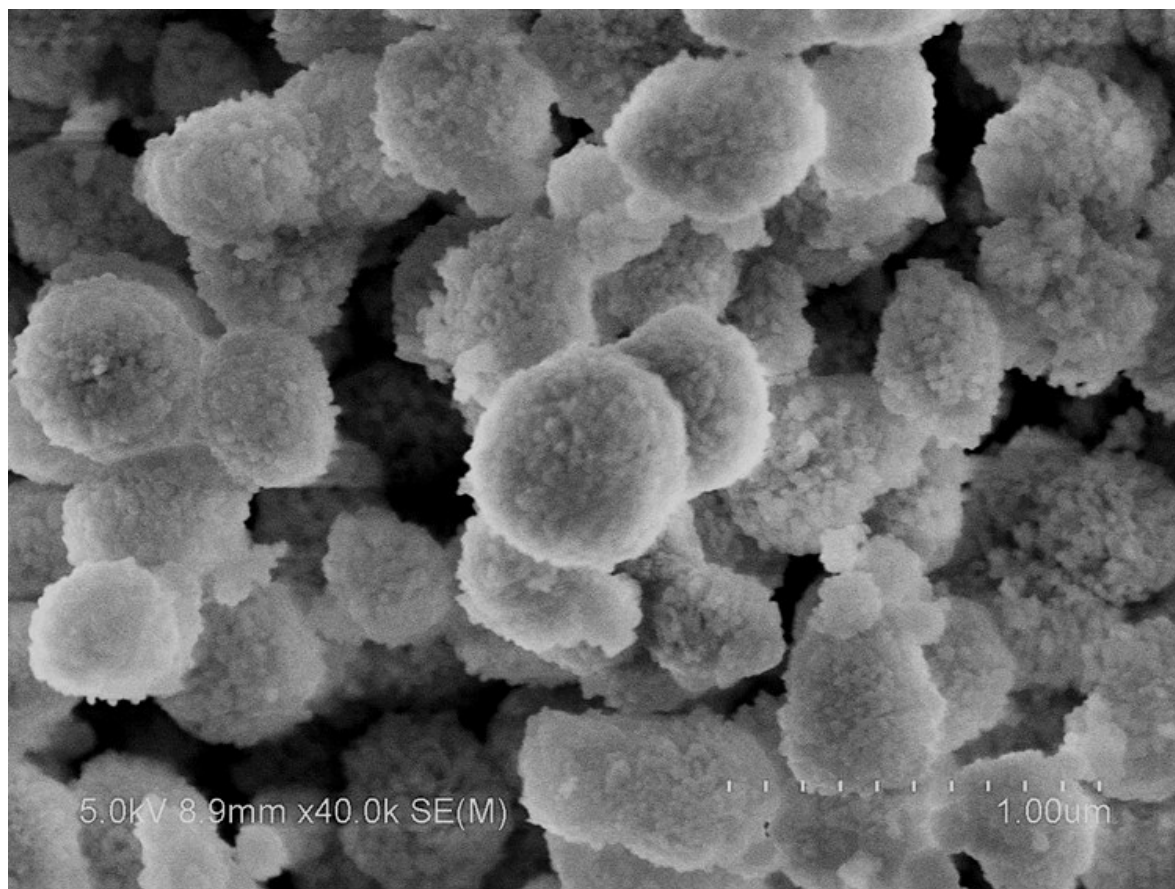

Supplement: c7ce01817g1.pdf [file c7ce01817g1.pdf]
